# Supplementary material
Source: HighWire-hosted journal article supplement (https://adc.bmj.com/content/108/8/616)
Supplement: inline-supplementary-material-1 [file inline-supplementary-material-1.pdf]

1

**Supplementary files**

Page 2: Supplementary Figure 1

Page 3: Supplementary Figure 2

Page 4: Supplementary Figure 3

Page 5: Supplementary Figure 4

Page 6: References for supplementary file

2

### Correlation between Cmax and AUC0-24

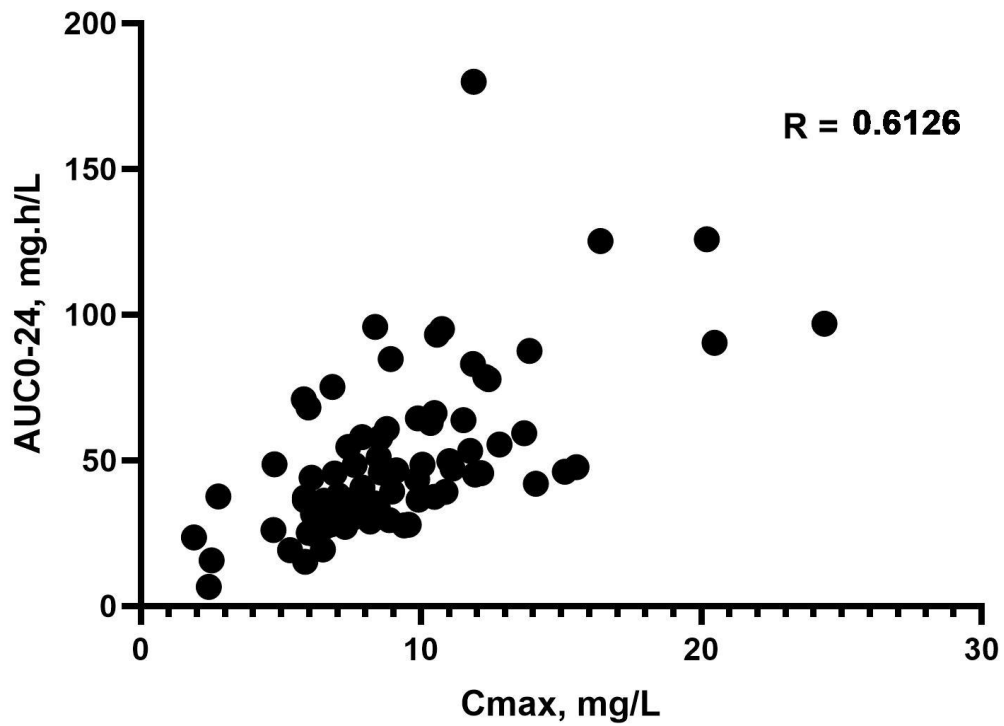

**Supplementary Figure 1 legend:** Correlation of serum peak concentration (Cmax) and serum total area under the concentration time curve (AUC0-24). N= 82 with calculable AUC0-24.

3

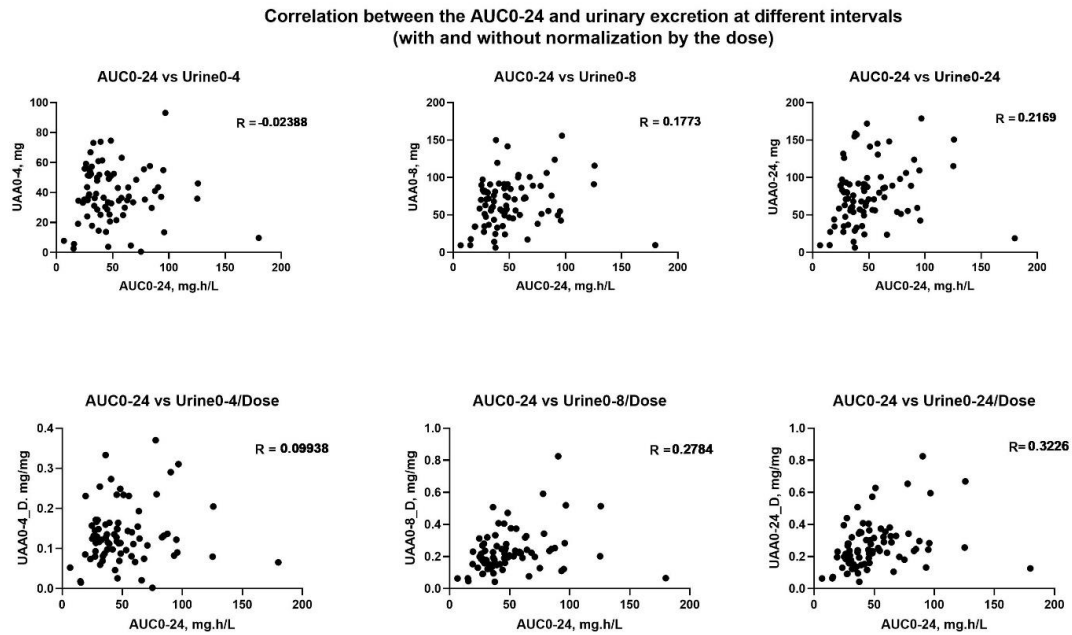

**Supplementary Figure 2 legend:** Correlation of rifampin serum area under the concentration time curve over the 24 hour dosing interval (AUC0-24) and urinary excretion of rifampin at different time intervals (0-4 hours, 0-8 hours and 0-24 hours) following dose. Urinary excretion is both unadjusted for dose (top panels) and adjusted (bottom panels).

4

### ROC curves with different thresholds for AUC0-24 vs Urine0-24/Dose

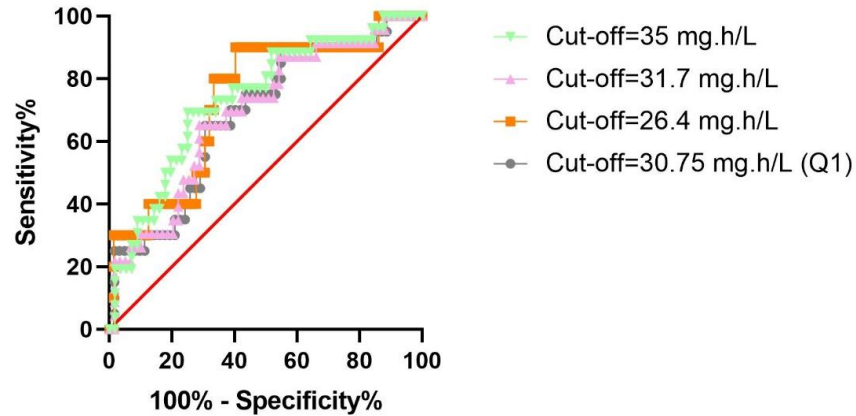

cut-off=26.4 mg.h/L

| Area under the ROC curve |                  |
|--------------------------|------------------|
| Area                     | 0.7333           |
| Std. Error               | 0.08360          |
| 95% confidence interval  | 0.5695 to 0.8972 |
| P value                  | 0.0173           |

cut-off=31.7 mg.h/L

| Area under the ROC curve |                  |
|--------------------------|------------------|
| Area                     | 0.6927           |
| Std. Error               | 0.06395          |
| 95% confidence interval  | 0.5674 to 0.8180 |
| P value                  | 0.0070           |

cut-off=35 mg.h/L

| Area under the ROC curve |                  |
|--------------------------|------------------|
| Area                     | 0.7356           |
| Std. Error               | 0.05902          |
| 95% confidence interval  | 0.6199 to 0.8513 |
| P value                  | 0.0006           |

cut-off=30.75 mg.h/L (Q1)

| Area under the ROC curve |                  |
|--------------------------|------------------|
| Area                     | 0.6847           |
| Std. Error               | 0.06738          |
| 95% confidence interval  | 0.5526 to 0.8167 |
| P value                  | 0.0134           |

**Supplemental Figure 3 legend:** ROC= Receiver Operator Characteristic curves for rifampin urinary dose excretion over 24 hours predicting different serum area under the concentration time curve (AUC0-24) threshold values: cut-off 26.4 mg\*h/L derived from weekly rifampin AUC to achieve <5% treatment failure among population of children from India [supplemental citation 1]; cut-off 31.7 mg\*h/L derived from weekly rifampin AUC to achieve <5% treatment modeled among a multinational population of children [supplemental citation 2 and manuscript citation 22]; 35 mg\*h/L derived from AUC0-24 predictive of treatment failure in an adult cohort from South Africa [supplemental citation 3]; cut-off 30.75 mg\*h/L as first quartile (Q1) of median drug AUC0-24 in Tanzanian cohort of this study.

5

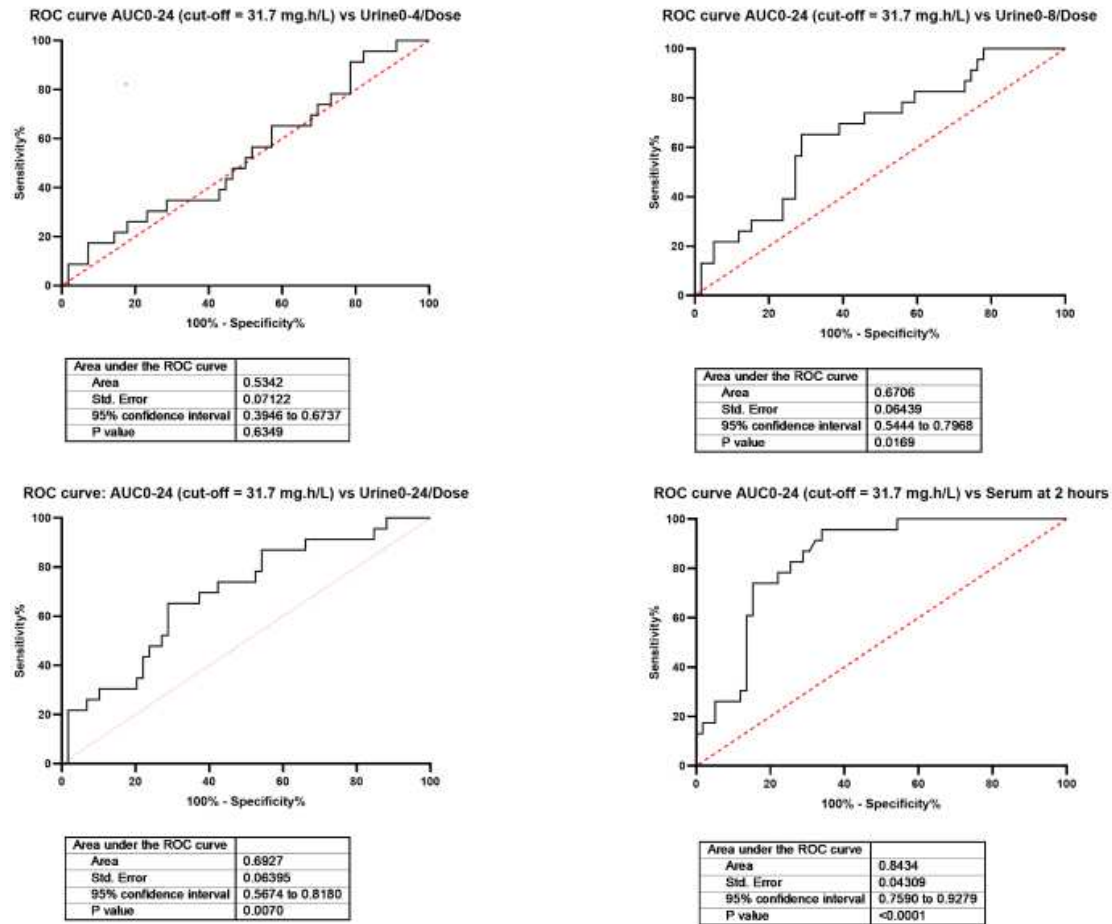

**Supplementary Figure 4 legend:** ROC= Receiver Operator Characteristic curves for rifampin urinary dose excretion over 0-4 hours, 0-8 hours, and 0-24 hours, and serum 2hr value (C2hr) to predict calculated serum area under the concentration time curve (AUC0-24) threshold value previously associated with tuberculosis treatment outcome in pediatric cohorts. C2hr has been commonly used estimate of peak concentration when applying therapeutic drug monitoring for rifampin in clinical settings.

**References for Supplementary Files (Supplementary Figure 3)**

1. Guiastrenec B, Ramachandran G, Karlsson MO, Kumar AKH, Bhavani PK, Gangadevi NP, Swaminathan S, Gupta A, Dooley KE, Savic RM. Suboptimal Antituberculosis Drug Concentrations and Outcomes in Small and HIV-Coinfected Children in India: Recommendations for Dose Modifications. *Clin Pharmacol Ther* 2018;104(4):733-741.
2. Radtke K, Dooley K, Dodd P et al. Alternative dosing guidelines to improve outcomes in childhood tuberculosis: a mathematical modelling study. *Lancet Child Adolescent Health* 2019; 3(9):636-645.  
(reference #22 in manuscript)
3. Pasipanodya JG, McIlleron H, Burger A, Wash PA, Smith P, Gumbo T. Serum drug concentrations predictive of pulmonary tuberculosis outcomes. *J Infect Dis* 2013; 208(9):1464-73.
